# Supplementary material for: Association of Single-Nucleotide Variants in the Human Leukocyte Antigen and Other Loci With Childhood Hodgkin Lymphoma
Source: PubMed Central journal article supplement (PMC9361085; doi:10.1001/jamanetworkopen.2022.25647), 2022-08-08

## Supplemental Online Content

Chen C, Song N, Dong Q, et al. Association of single-nucleotide variants in the human leukocyte antigen and other loci with childhood Hodgkin lymphoma. *JAMA Netw Open*. 2022;5(8):e2225647. doi:10.1001/jamanetworkopen.2022.25647

**eFigure 1.** Study Population Flow Diagram

**eFigure 2.** Quantile-Quantile Plot for the *P* Values in the  $-\log_{10}$  Scale for the Discovery GWAS Meta-analysis

**eFigure 3.** Pair-wise Linkage Disequilibrium Among 3 Independent SNPs in HLA Region

**eTable 1.** Meta-GWAS Results for Previously Published HL-Associated SNPs in HLA Region

**eTable 2.** Significant Amino Acid Changes Associated With HL in HLA Genes

**eTable 3.** Previously Reported HLA Alleles Associated With HL Susceptibility

**eTable 4.** Meta-GWAS Results for Previously Published HL-Associated SNPs in Non-HLA Region

**eFigure 4.** SNV rs117953624 near *PDGFD*

This supplemental material has been provided by the authors to give readers additional information about their work.

**eFigure 1. Study Population Flow Diagram**

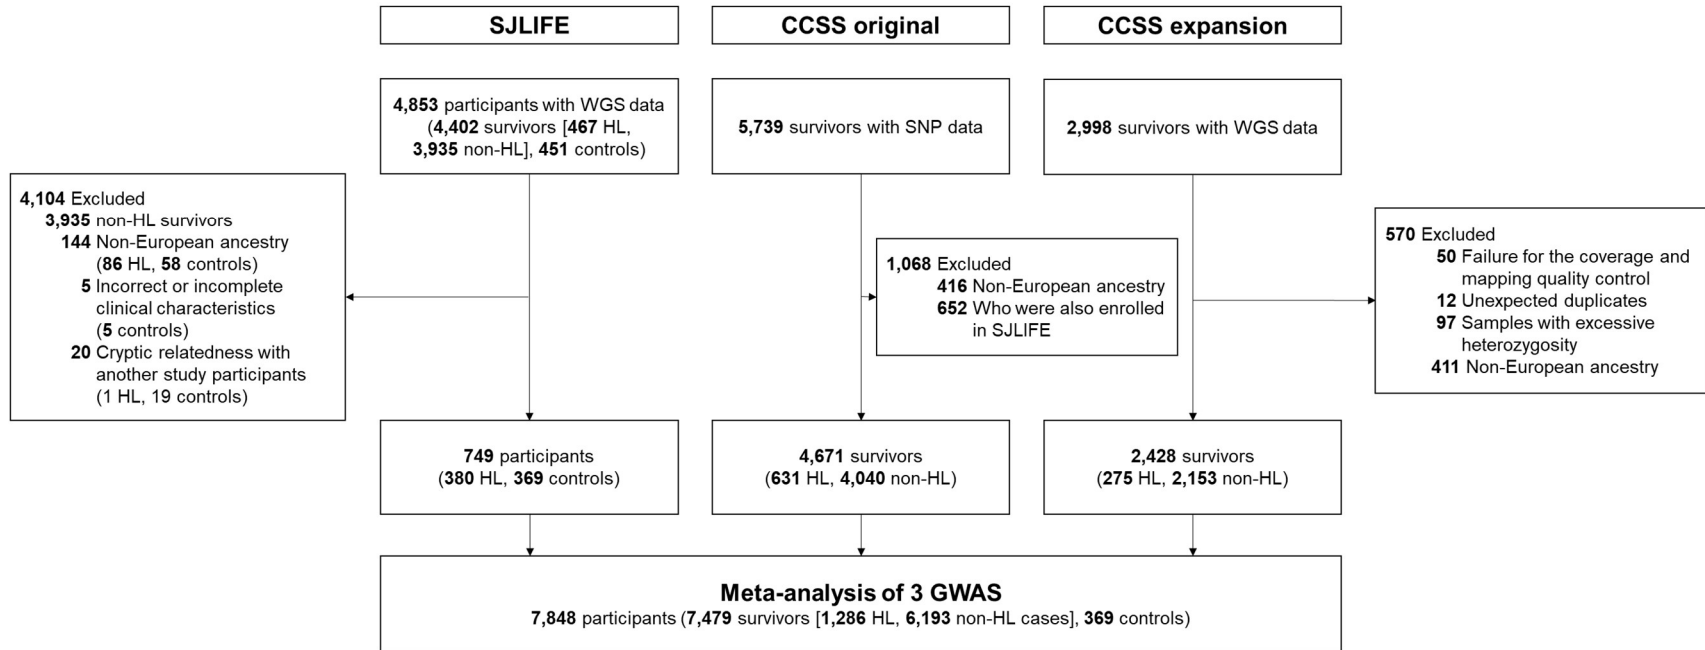

Abbreviations: SJLIFE, St. Jude Lifetime Cohort Study; WGS, whole-genome sequencing; CCSS, Childhood Cancer Survivor Study; HL, Hodgkin lymphoma; SNP, single-nucleotide polymorphism; GWAS, genome-wide association study.

eFigure 2. Quantile-Quantile Plot for the  $P$  Values in the  $-\log_{10}$  Scale for the Discovery GWAS Meta-analysis

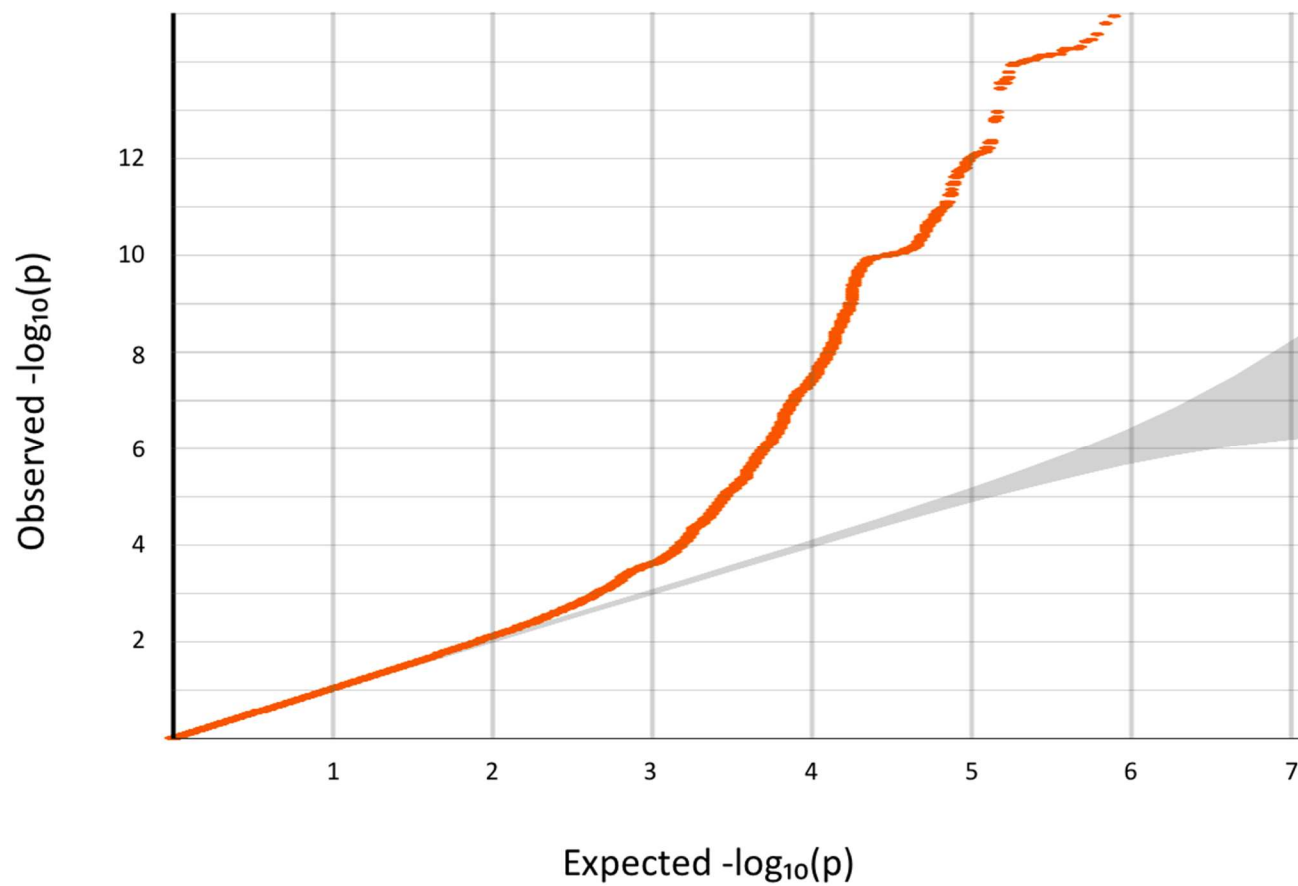

eFigure 3. Pair-wise Linkage Disequilibrium Among 3 Independent SNPs in HLA Region

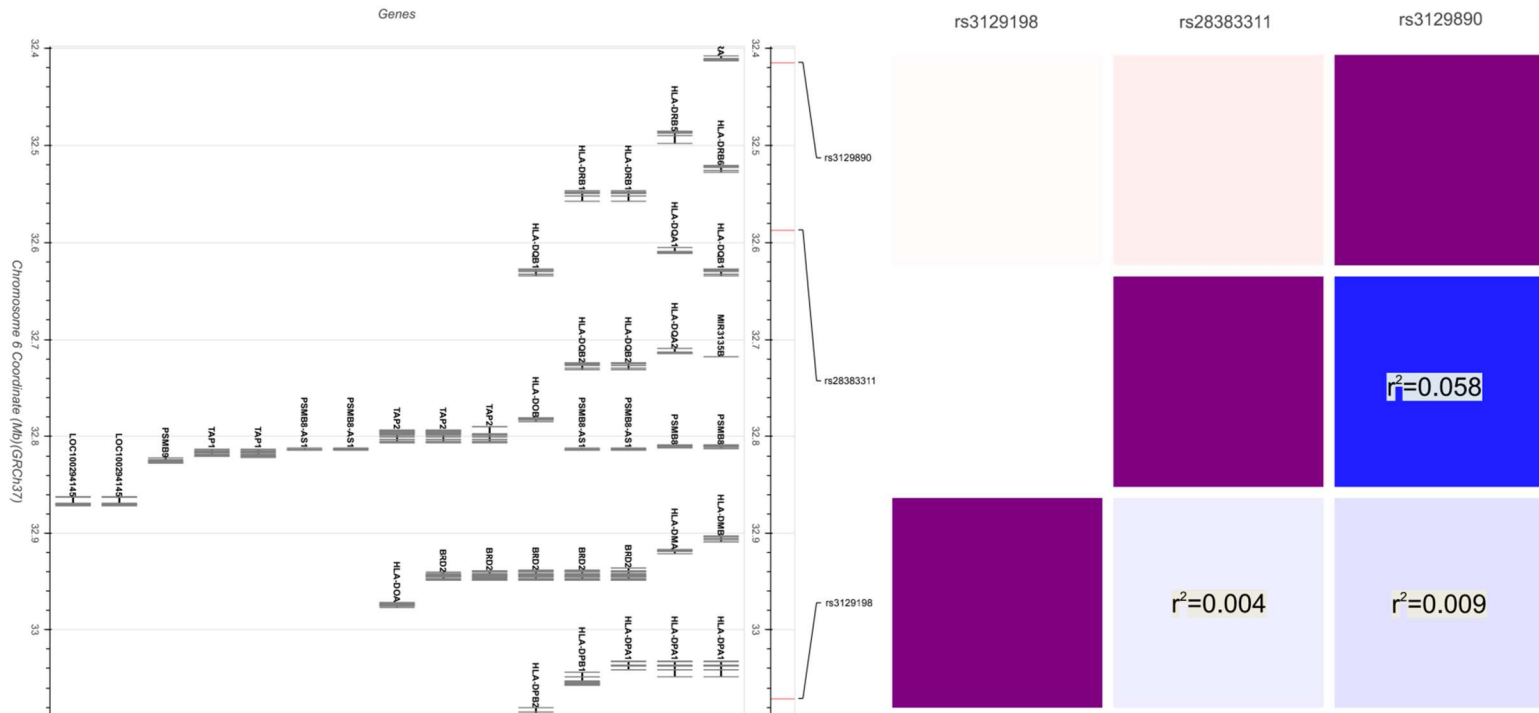

**eTable 1. Meta-GWAS Results for Previously Published HL-Associated SNPs in HLA Region**

| SNP        | Position <sup>†</sup> | Neighboring genes | Risk allele | OR   | 95% CI       | <i>P</i> | <i>P</i> <sub>het</sub> | <i>I</i> <sup>2</sup> , % | Published Study PMID <sup>‡</sup>                |
|------------|-----------------------|-------------------|-------------|------|--------------|----------|-------------------------|---------------------------|--------------------------------------------------|
| rs204999   | chr6:32142202:A:G     | <i>PRRT1</i>      | A           | 1.46 | (1.31, 1.63) | 1.43E-11 | 6.73E-01                | 0.00                      | 22086417                                         |
| rs1633096  | chr6:29739490:G:T     | <i>HLA-F</i>      | T           | 1    | (0.9, 1.11)  | 9.99E-01 | 2.04E-01                | 37.05                     | 29196614                                         |
| rs2248462  | chr6:31479019:G:A     | <i>MICB</i>       | G           | 1.3  | (1.16, 1.46) | 6.22E-06 | 4.16E-01                | 0.00                      | 22286212                                         |
| rs2281389  | chr6:33092019:A:G     | <i>HLA-DPB1</i>   | G           | 1.53 | (1.38, 1.71) | 8.33E-15 | 2.97E-01                | 17.67                     | 21596858                                         |
| rs2395185  | chr6:32465390:G:T     | <i>HLA-DRA</i>    | G           | 1.11 | (1.01, 1.22) | 3.74E-02 | 6.73E-01                | 0.00                      | 22286212                                         |
| rs2734986  | chr6:29850791:T:C     | <i>HLA-A</i>      | T           | 1    | (0.89, 1.13) | 9.37E-01 | 3.70E-01                | 0.00                      | 22286212                                         |
| rs2858870  | chr6:132604474:A:G    | <i>HLA-DRA</i>    | A           | 1.11 | (1.01, 1.22) | 2.41E-02 | 8.76E-01                |                           | 22086417                                         |
| rs6457715  | chr6:33115411:A:G     | <i>HLA-DPB1</i>   | A           | 1.04 | (0.93, 1.15) | 4.91E-01 | 7.41E-01                | 0.00                      | 26404960                                         |
| rs6903608  | chr6:32460508:C:T     | <i>HLA-DRA</i>    | C           | 1.44 | (1.31, 1.58) | 1.00E-14 | 5.26E-01                | 0.00                      | 21037568, 21596858, 22086417, 22286212, 24149102 |
| rs6904029  | chr6:29975290:G:A     | <i>HcG9/HLA-A</i> | A           | 1.05 | (0.95, 1.15) | 3.72E-01 | 1.04E-02                | 78.10                     | 22286212                                         |
| rs9268528  | chr6:32415331:A:G     | <i>HLA-DRA</i>    | G           | 1.37 | (1.25, 1.5)  | 1.19E-11 | 1.97E-01                | 38.44                     | 22086417                                         |
| rs9268542  | chr6:32416944:A:G     | <i>HLA-DRA</i>    | G           | 1.37 | (1.25, 1.49) | 1.34E-11 | 1.64E-01                | 44.65                     | 22086417                                         |
| rs9269081  | chr6:32473323:A:C     | <i>HLA-DRA</i>    | A           | 1.53 | (1.4, 1.69)  | 2.41E-19 | 2.90E-01                | 19.33                     | 29196614                                         |
| rs13196329 | chr6:32357594:A:C     | <i>C6orf10</i>    | C           | 1.47 | (1.07, 2.01) | 1.59E-02 | 5.73E-02                | 65.02                     | 29196614                                         |

Abbreviations: GWAS, genome-wide association study; HL, Hodgkin Lymphoma; OR, odds ratio; CI, confidence interval.

<sup>†</sup>Position according to human reference GRCh38.

Heterogeneity between data sets was assessed by *P*-value (*P*<sub>het</sub>) and inverse variance (*I*<sup>2</sup>) using the Cochran's Q statistic.

<sup>‡</sup>PMID for studies previously published the HL-associated SNP in HLA region.

**eTable 2. Significant Amino Acid Changes Associated With HL in HLA Genes**

| Marker ID               | Position† | Effect allele | Non effect allele | Imputed Z‡ | r <sup>2</sup> pred* | Imputed P |
|-------------------------|-----------|---------------|-------------------|------------|----------------------|-----------|
| AA_DQB1_-5_32742280_L   | 32634302  | P             | A                 | 8.64       | 0.90                 | 5.65E-18  |
| AA_DQB1_87_32740576_LY  | 32632598  | A             | P                 | 8.21       | 0.88                 | 2.30E-16  |
| AA_DQB1_87_32740576_F   | 32632598  | P             | A                 | 8.11       | 0.89                 | 5.23E-16  |
| AA_DQB1_38_32740723     | 32632745  | V             | A                 | -7.84      | 0.92                 | 4.39E-15  |
| AA_DQB1_71_32740624_KA  | 32632646  | P             | A                 | -7.77      | 0.91                 | 7.78E-15  |
| AA_DQB1_57_32740666_D   | 32632688  | P             | A                 | 7.76       | 0.88                 | 8.62E-15  |
| AA_DQB1_77_32740606     | 32632628  | R             | T                 | -7.69      | 0.91                 | 1.48E-14  |
| AA_DQB1_75_32740612     | 32632634  | V             | L                 | -7.48      | 0.90                 | 7.45E-14  |
| AA_DQB1_74_32740615_E   | 32632637  | A             | P                 | -7.48      | 0.90                 | 7.45E-14  |
| AA_DQB1_71_32740624_T   | 32632646  | A             | P                 | -7.48      | 0.90                 | 7.45E-14  |
| AA_DRB1_30_32660058_YHR | 32552080  | A             | P                 | -7.28      | 0.94                 | 3.22E-13  |
| AA_DRB1_11_32660115_SPV | 32552137  | A             | P                 | -7.28      | 0.94                 | 3.22E-13  |
| AA_DRB1_30_32660058_YR  | 32552080  | A             | P                 | -6.98      | 0.89                 | 2.91E-12  |
| AA_DRB1_30_32660058_YH  | 32552080  | A             | P                 | -6.96      | 0.94                 | 3.30E-12  |
| AA_DRB1_13_32660109_YF  | 32552131  | P             | A                 | -6.96      | 0.94                 | 3.30E-12  |
| AA_DQB1_57_32740666_AD  | 32632688  | A             | P                 | -6.80      | 0.92                 | 1.06E-11  |
| AA_DQB1_87_32740576_Y   | 32632598  | P             | A                 | -6.78      | 0.92                 | 1.18E-11  |
| AA_DQB1_57_32740666_AV  | 32632688  | A             | P                 | 6.77       | 0.92                 | 1.31E-11  |
| AA_DQB1_87_32740576_LF  | 32632598  | A             | P                 | -6.70      | 0.92                 | 2.02E-11  |
| AA_DRB1_30_32660058_Y   | 32552080  | A             | P                 | -6.69      | 0.90                 | 2.24E-11  |
| AA_DRB1_13_32660109_SRH | 32552131  | A             | P                 | -6.68      | 0.88                 | 2.47E-11  |
| AA_DRB1_30_32660058_LC  | 32552080  | P             | A                 | -6.55      | 0.94                 | 5.81E-11  |
| AA_DRB1_11_32660115_GL  | 32552137  | P             | A                 | -6.55      | 0.94                 | 5.81E-11  |
| AA_DQB1_-5_32742280_PL  | 32634302  | A             | P                 | -6.47      | 0.91                 | 1.00E-10  |
| AA_DQB1_-9_32742292_M   | 32634314  | A             | P                 | -6.46      | 0.91                 | 1.05E-10  |
| AA_DQB1_-27_32742346_A  | 32634368  | A             | P                 | -6.46      | 0.91                 | 1.05E-10  |
| AA_DQB1_-5_32742280_PS  | 32634302  | A             | P                 | 6.44       | 0.92                 | 1.18E-10  |
| AA_DRB1_28_32660064_D   | 32552086  | A             | P                 | -6.39      | 0.90                 | 1.70E-10  |
| AA_DQB1_30_32740747_Y   | 32632769  | P             | A                 | 6.34       | 0.91                 | 2.31E-10  |
| AA_DQB1_57_32740666_V   | 32632688  | P             | A                 | -6.29      | 0.95                 | 3.26E-10  |
| AA_DRB1_30_32660058_YGR | 32552080  | A             | P                 | -6.23      | 0.90                 | 4.59E-10  |
| AA_DRB1_30_32660058_YHG | 32552080  | A             | P                 | -6.21      | 0.95                 | 5.21E-10  |
| AA_DQB1_-9_32742292_I   | 32634314  | P             | A                 | -6.05      | 0.93                 | 1.48E-09  |
| AA_DQB1_224_32737107_R  | 32629129  | P             | A                 | -6.00      | 0.93                 | 1.98E-09  |
| AA_DQB1_125_32737913_S  | 32629935  | P             | A                 | -6.00      | 0.93                 | 1.98E-09  |
| AA_DQB1_116_32737940_I  | 32629962  | P             | A                 | -6.00      | 0.93                 | 1.98E-09  |
| AA_DQB1_71_32740624_A   | 32632646  | P             | A                 | -6.00      | 0.93                 | 1.98E-09  |
| AA_DQB1_-5_32742280_S   | 32634302  | P             | A                 | -6.00      | 0.93                 | 1.98E-09  |

|                         |          |   |   |       |      |          |
|-------------------------|----------|---|---|-------|------|----------|
| AA_DQB1_-27_32742346_S  | 32634368 | P | A | -6.00 | 0.93 | 1.98E-09 |
| AA_DRB1_30_32660058_YG  | 32552080 | A | P | -5.93 | 0.90 | 3.04E-09 |
| AA_DQB1_14_32740795_L   | 32632817 | P | A | -5.91 | 0.92 | 3.33E-09 |
| AA_DQB1_45_32740702     | 32632724 | E | G | 5.91  | 0.89 | 3.35E-09 |
| AA_DQB1_14_32740795_M   | 32632817 | A | P | -5.87 | 0.92 | 4.41E-09 |
| AA_DQB1_116_32737940_V  | 32629962 | A | P | -5.86 | 0.92 | 4.63E-09 |
| AA_DQB1_125_32737913_AG | 32629935 | A | P | -5.85 | 0.92 | 4.85E-09 |
| AA_DQB1_125_32737913_AS | 32629935 | A | P | 5.80  | 0.92 | 6.73E-09 |
| AA_DQB1_224_32737107_Q  | 32629129 | A | P | -5.78 | 0.91 | 7.56E-09 |
| AA_DQB1_125_32737913_G  | 32629935 | P | A | 5.69  | 0.92 | 1.29E-08 |
| AA_DRB1_28_32660064_E   | 32552086 | P | A | -5.61 | 0.91 | 1.97E-08 |
| AA_DRB1_78_32659914     | 32551936 | V | Y | -5.54 | 0.91 | 3.06E-08 |
| AA_DRB1_30_32660058_LG  | 32552080 | P | A | -5.54 | 0.91 | 3.06E-08 |
| AA_DRB1_11_32660115_GD  | 32552137 | P | A | -5.54 | 0.91 | 3.06E-08 |
| AA_DRB1_4_32665400_Q    | 32557422 | P | A | -5.54 | 0.91 | 3.06E-08 |
| AA_DQB1_167_32737787_R  | 32629809 | A | P | 5.48  | 0.87 | 4.21E-08 |
| AA_DRB1_58_32659974_A   | 32551996 | A | P | 5.46  | 0.82 | 4.73E-08 |

Abbreviations: HL, Hodgkin Lymphoma.

† Position refers to the genomic coordinates based on GRCh37.

‡ Z score represents HL association.

\*r<sup>2</sup>pred represents assessment of the imputation reliability at each HLA variant.

**eTable 3. Previously Reported HLA Alleles Associated With HL Susceptibility**

| Marker ID     | Position <sup>†</sup> | Effect allele | Non effect allele | Imputed Z <sup>§</sup> | r <sup>2</sup> pred <sup>*</sup> | Imputed P | Published Study PMID <sup>‡</sup> |
|---------------|-----------------------|---------------|-------------------|------------------------|----------------------------------|-----------|-----------------------------------|
| HLA_A_01      | 29911991              | Presence      | Absence           | 0.14                   | 0.97                             | 8.88E-01  | 34830986                          |
| HLA_B_37      | 31323293              | Presence      | Absence           | 1.76                   | 0.75                             | 7.77E-02  | 22808081                          |
| HLA_DPB1_0301 | 33049368              | Presence      | Absence           | 2.72                   | 0.88                             | 6.61E-03  | 29196614                          |
| HLA_DQA1_0201 | 32608306              | Presence      | Absence           | -4.83                  | 0.92                             | 1.35E-06  | 21596858                          |
| HLA_DQB1_0303 | 32631061              | Presence      | Absence           | -3.99                  | 0.82                             | 6.51E-05  | 21596858                          |
| HLA_DQB1_0602 | 32631061              | Presence      | Absence           | 6.08                   | 0.88                             | 1.17E-09  | 21596858                          |
| HLA_DRB1_0701 | 32552064              | Presence      | Absence           | -4.66                  | 0.92                             | 3.17E-06  | 21596858                          |
| HLA_DRB1_1501 | 32552064              | Presence      | Absence           | 5.84                   | 0.89                             | 5.28E-09  | 21596858                          |

Abbreviations: HL, Hodgkin Lymphoma.

<sup>†</sup> Position refers to the genomic coordinates based on GRCh37.

<sup>§</sup> Z score represents HL association.

<sup>\*</sup> r<sup>2</sup>pred represents assessment of the imputation reliability at each HLA variant.

<sup>‡</sup> PMID for studies previously published the HL-associated HLA alleles.



**eTable 4. Meta-GWAS Results for Previously Published HL-Associated SNPs in Non-HLA Region**

| SNP         | Position <sup>†</sup> | Neighboring genes   | Risk allele | OR   | 95% CI       | P        | P <sub>het</sub> | I <sup>2</sup> , % | Published Study PMID <sup>‡</sup> |
|-------------|-----------------------|---------------------|-------------|------|--------------|----------|------------------|--------------------|-----------------------------------|
| rs1432295   | chr2:60839531:G:A     | REL                 | G           | 1.20 | (1.10, 1.32) | 6.42E-05 | 4.36E-01         | 0.00               | 21037568                          |
| rs2019960   | chr8:128180025:T:C    | PVT1                | C           | 1.30 | (1.17, 1.44) | 7.05E-07 | 8.03E-01         | 0.00               | 21037568, 24920014                |
| rs20541     | chr5:132660272:A:G    | IL13                | A           | 1.19 | (1.07, 1.32) | 1.52E-03 | 6.92E-01         | 0.00               | 22286212                          |
| rs3806624   | chr3:27723132:A:G     | EOMES               | G           | 1.21 | (1.11, 1.32) | 3.21E-05 | 7.56E-01         | 0.00               | 24149102                          |
| rs7745098   | chr6:135093866:C:T    | HBS1L, MYB          | C           | 1.05 | (0.96, 1.15) | 2.78E-01 | 2.41E-01         | 29.78              | 24149102                          |
| rs2069757   | chr5:132662721:G:A    | IL13                | A           | 1.19 | (1.03, 1.39) | 2.20E-02 | 3.36E-01         | 8.30               | 24920014                          |
| rs1860661   | chr19:1650135:A:G     | TCF3                | NA          | NA   | NA           | NA       | NA               | NA                 | 24920014                          |
| rs4459895   | chr3:188236626:A:C    | LPP                 | A           | 1.22 | (1.09, 1.37) | 4.89E-04 | 4.02E-01         | 0.00               | 29196614                          |
| rs9482849   | chr6:127967391:T:C    | PTPRK               | C           | 1.21 | (1.07, 1.36) | 1.80E-03 | 8.38E-01         | 0.00               | 29196614                          |
| rs6928977   | chr6:135305210:T:G    | AHI1                | G           | 1.18 | (1.07, 1.29) | 4.89E-04 | 2.78E-01         | 21.81              | 29196614                          |
| rs3781093   | chr10:8059964:T:C     | GATA3               | T           | 1.44 | (1.26, 1.65) | 1.01E-07 | 1.75E-01         | 42.67              | 29196614                          |
| rs112998813 | chr13:114294254:T:C   | UPF3A               | T           | 1.12 | (0.94, 1.34) | 1.97E-01 | 7.84E-01         | 0.00               | 29196614                          |
| rs34972832  | chr16:11105081:G:A    | CLEC16A             | A           | 1.21 | (1.09, 1.35) | 3.44E-04 | 9.24E-01         | 0.00               | 29196614                          |
| rs649775    | chr6:33716536:A:G     | ITPR3, UQCC2, IP6K3 | A           | 1.30 | (1.12, 1.51) | 5.21E-04 | 4.83E-01         | 0.00               | 30194254                          |
| rs1002658   | chr6:137660447:C:T    | OLIG3, TNFAIP3      | T           | 1.13 | (1.01, 1.26) | 3.37E-02 | 2.54E-01         | 26.97              | 30194254                          |
| rs7111520   | chr11:111378886:G:A   | POU2AF1             | A           | 1.04 | (0.95, 1.15) | 3.81E-01 | 6.11E-01         | 0.00               | 30194254                          |
| rs6565176   | chr16:30163605:T:C    | MAPK3, CORO1A       | T           | 1.08 | (0.99, 1.18) | 9.10E-02 | 8.39E-01         | 0.00               | 30194254                          |
| rs2425752   | chr20:46073481:T:C    | NCOA5, CD40         | T           | 1.09 | (0.98, 1.21) | 1.21E-01 | 8.81E-01         | 0.00               | 30194254                          |

Abbreviations: GWAS, genome-wide association study; HL, Hodgkin Lymphoma; OR, odds ratio; CI, confidence interval.

<sup>†</sup>Position according to human reference GRCh38.

Heterogeneity between data sets was assessed by *P*-value (*P*<sub>het</sub>) and inverse variance (*I*<sup>2</sup>) using the Cochran's Q statistic.

<sup>‡</sup>PMID for studies previously published the HL-associated SNP in non-HLA region.

**eFigure 4.** SNV rs117953624 near *PDGFD*

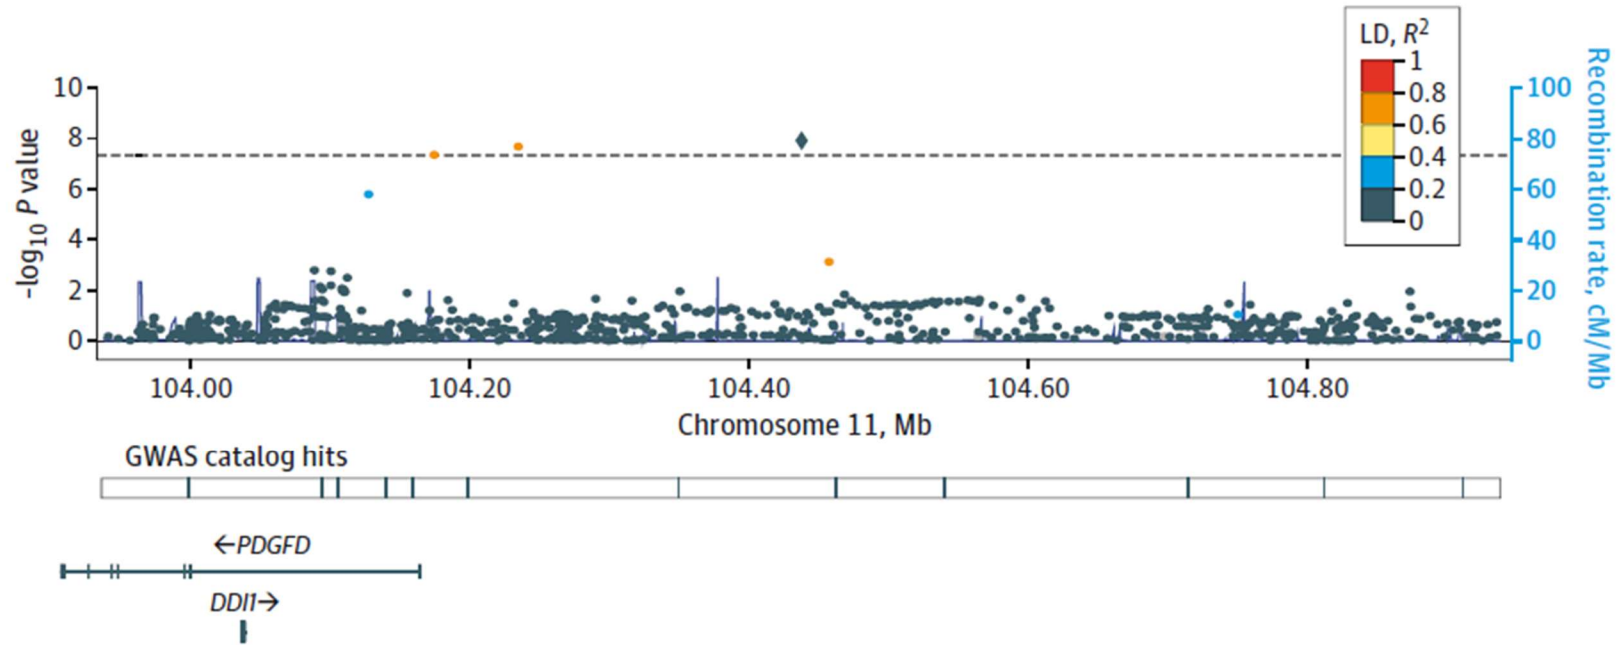

Supplement: jamanetwopen-e2225647-s001.pdf [file jamanetwopen-e2225647-s001.pdf]
